# Supplementary material for: Large-scale genetic analysis reveals mammalian mtDNA heteroplasmy dynamics and variance increase through lifetimes and generations
Source: PubMed Central journal article supplement (PMC6021422; doi:10.1038/s41467-018-04797-2), 2018-06-27
Supplement: 41467_2018_4797_MOESM3_ESM.pdf [file 41467_2018_4797_MOESM3_ESM.pdf]

## **Description of Additional Supplementary Files**

File Name: Supplementary Data 1

Description: Raw heteroplasmy measurements from HB and LE mouse models, labelled by model, type (oocyte or pup), age, and sex of mice.
